# Supplementary material
Source: PubMed Central journal article supplement (PMC3492057)
Supplement: NIHMS409680-supplement-1.pdf [file NIHMS409680-supplement-1.pdf]

## SUPPLEMENTARY MATERIAL

**Table 1. Tumor Types**

| <b>Tumor Type</b>  | <b>N (%)</b> | <b>Sub-Type</b>                                | <b>N</b> |
|--------------------|--------------|------------------------------------------------|----------|
| Glioma:            | 246 (57.1)   | Low-Grade                                      | 189      |
|                    |              | High-Grade                                     | 57       |
| Ependymoma:        | 18 (4.2)     |                                                |          |
| Embryonal:         | 105 (24.6)   | Medulloblastoma                                | 74       |
|                    |              | Supratentorial Primitive Neuroectodermal Tumor | 9        |
|                    |              | Pineoblastoma                                  | 10       |
|                    |              | Atypical Teratoid Rhabdoid Tumor               | 12       |
|                    |              |                                                |          |
| Craniopharyngioma: | 17 (3.9)     |                                                |          |
| Germ Cell:         | 20 (4.6)     | Germinoma                                      | 13       |
|                    |              | Teratoma                                       | 4        |
|                    |              | Non-Germinomatous Germ-Cell Tumor              | 4        |
|                    |              |                                                |          |
| Other:             | 24 (5.6)     | Meningioma                                     | 6        |
|                    |              | Choroid Plexus                                 |          |
|                    |              | Papilloma/Carcinoma                            | 7        |
|                    |              | Adenoma                                        | 3        |
|                    |              | Giant Cell Tumor                               | 3        |
|                    |              | Medulloepithelioma                             | 1        |
|                    |              | Desmoplastic Neuroepithelial Tumor             | 1        |
|                    |              | Sarcoma                                        | 1        |
|                    |              | Chordoma                                       | 1        |
|                    |              | Melanoma                                       | 1        |
